# Supplementary material for: Prenatal Diagnosis and Pregnancy Termination in Jewish and Muslim Women with a Deaf Child in Israel
Source: MDPI journal article supplement (doi:10.3390/children10091438), 2023-08-23
Supplement: s1 [file s1]

## **Supplementary S1:**

### **Online questionnaire**

#### **Part A:**

- 1. Age in years -----**
- 2. Place of residence:**
  1. City 2. Village 3. Community Settlement
- 3. Population group:**
  1. Muslims 2. Bedouins 3. Druze 4. Christians 5. Jewish
- 4. Level of religiosity:**
  1. Secular 2. Traditional 3. Religious 4. Jewish Ultra-Orthodox
- 5. Education:**
  1. Elementary school 2. High school 3. Post-secondary (Diploma) 4. Academic
- 6. Do you have a first or second-degree relative with hearing impairments?**
  1. Yes 2. No
- 7. Do you have children with hearing impairments?**
  1. Yes 2. No
- 8. Are you aware that you and/or your spouse carry a gene for deafness?**
  1. Usher syndrome 2. Connexin 3. Nephronophthisis 4. Alport syndrome 5. CMV 6. Cystinosis 7. Unknown
- 9. Have you undergone invasive tests like amniocentesis or Chorionic Villus Sampling (CVS)?** 1. Yes 2. No
- 10. Have you ever terminated a pregnancy due to a fetus being deaf?**
  1. Yes 2. No

**Part B: Level of Agreement for the following attitudes:**

1. Strongly disagree
2. Disagree
3. Slightly agree
4. Moderately agree
5. Strongly agree

**11. If an amniocentesis or CVS reveals a fetus with deafness, I would consider voluntary termination of pregnancy.**

**12. After receiving genetic counseling based on blood tests (mine and my partner's), CVS, and/or amniocentesis, I would consider voluntary termination of pregnancy for a deaf fetus.**

**13. I would consult with a religious figure (rabbi, imam) about performing an invasive diagnostic test (e.g., CVS or amniocentesis) to know if my baby suffers from deafness.**

**14. I believe it should be possible to perform a planned termination of pregnancy when the fetus suffers from deafness.**

**15. I believe it should be possible to perform a planned termination of pregnancy when the couple cannot financially support a deaf child.**

**16. I believe there is a connection between the decision to perform a voluntary termination of pregnancy due to fetal deafness and the level of religious faith.**

**17. If I decide to have a planned termination of pregnancy due to a diagnosis of a deaf fetus, I believe that my family would support my decision.**

**18. I would support a planned termination of pregnancy due to fetal deafness if it would prevent suffering for the child.**

**19. I would support a planned termination of pregnancy due to fetal deafness if it would prevent suffering for the family.**

**20. I think my close friends would support me in making a decision on a planned termination of pregnancy due to fetal deafness.**

**21. I think my partner would support a decision on a planned termination of pregnancy due to fetal deafness.**

**22. I believe it is necessary to involve my partner in the decision about a planned termination of pregnancy due to fetal deafness.**

**23. There are negative views in my community about women who have a planned termination of pregnancy due to fetal deafness.**

**24. I would consider not having a planned termination of pregnancy if it is discovered that the baby is deaf after a diagnostic test, due to the availability of technological devices such as hearing aids, cochlear implant rehabilitation, etc.**

**25. If I had a deaf child, I would perform pre-implantation genetic testing for subsequent pregnancies – in order to implant only embryos without deafness.**
